# Supplementary material
Source: Research Square preprint supplement (doi:10.21203/rs.3.rs-9236007/v1)
Supplement: Supplementary file 1 [file a2e68cb1721e6f93bdc2cc22.xlsx]

## Sheet: Feuil1
	Family 1				Family 2
	F1.1	F1.2 (father of F1.1)	F1.3 (uncle of F1.1)	F1.4 (grand cousin of F1.1)	F2.1	F2.2 (father of F2.1)
Skin	Fair	Fair	Fair	Fair	Fair	Fair
Hair	Blond	Brown	-	Light Brown	Brown	Brown
Nystagmus	Yes	Yes	-	Yes	Yes	Yes
Photophobia	-	-	-	Yes	-	-
Strabismus	-	-	-	Yes	-	-
Refractive error	Hyperopia	Hyperopia	-	Hyperopia	Hyperopia Astigmatism	Hyperopia Astigmatism
Visual acuity	OD 1.6/10 OS 2.5/10	2.5/10	-	NA	OD 5/10 OS 8/10	OD 2.5/10 OS 2.5/10
Iris transillumination	-	-	-	-	Yes	Yes
Retinal hypopigmentation	Yes	-	-	-	Yes	Yes
Foveal hypoplasia	Yes	Yes	Yes	Yes	Yes	Yes
Table 1: Phenotype of individuals included in the study. OS: left eye. OD: right eye. - indicates that data are not available.
